## **Fractal correlation properties of heart rate variability as a marker of exercise intensity during incremental and constant-speed treadmill running**

van Rassel, C. R.,<sup>1</sup> Ajayi, O. O.,<sup>1</sup> Sales, K. M.,<sup>1</sup> Clermont, A. C.,<sup>1,2</sup> M. Rummel,<sup>3</sup> and MacInnis, M.J. <sup>1\*</sup>

<sup>1</sup>Faculty of Kinesiology, University of Calgary, Calgary, AB, Canada, T2N 1N4

<sup>2</sup>Canadian Sport Institute, Calgary, AB, Canada, T3B 6B7

<sup>3</sup>AI Endurance Inc., Hamilton, ON, Canada, L8P 0A1

### **\*Corresponding Author:**

Martin MacInnis, PhD

Faculty of Kinesiology

University of Calgary

Calgary, AB

Canada

T2N 1N4

Email:martin.macinnis@ucalgary.ca

## Abstract:

The short-term scaling exponent of detrended fluctuation analysis (DFA $\alpha$ 1) applied to interbeat intervals may provide a method to identify ventilatory thresholds and indicate systemic perturbation during prolonged exercise. The purposes of this study were to i) confirm whether DFA $\alpha$ 1 values of 0.75 and 0.5 coincide with the gas exchange threshold (GET) and respiratory compensation point (RCP), ii) quantify DFA $\alpha$ 1 during constant-speed running near the maximal lactate steady state (MLSS), and iii) assess the repeatability of DFA $\alpha$ 1 between MLSS trials. Seventeen runners performed an incremental running test, and eleven and ten runners also performed constant-speed running 5% below, at, and 5% above the MLSS, and a repeat trial at MLSS, respectively. GET (bias [LOA]: -3.6 [-9.1 to 1.9] mL·kg<sup>-1</sup>·min<sup>-1</sup>) and RCP (-3.5 [-14.1 to 7.2] mL·kg<sup>-1</sup>·min<sup>-1</sup>) were overestimated using DFA $\alpha$ 1. DFA $\alpha$ 1 responses during 30-min running trials near MLSS were variable (i.e., 0.27 to 1.24), and affected by intensity (p=0.019) and duration (p=0.001). No difference in DFA $\alpha$ 1 was detected between MLSS trials (p=0.926). These results question whether DFA $\alpha$ 1 values can accurately delineate exercise thresholds, but the dependency of DFA $\alpha$ 1 on intensity and duration support its potential use to quantify systemic perturbations imposed by continuous exercise.

**Key Words:** Heart rate variability, detrended fluctuation analysis, non-linear analysis, exercise intensity, exercise training, exercise performance

## Introduction

Training intensity distribution frameworks divide exercise into at least three predetermined intensity zones (Esteve-Lanao et al., 2007; Seiler & Kjerland, 2006). In one model, the moderate, heavy, and severe exercise intensity domains are delineated by the lactate threshold (LT) and maximal metabolic steady state (MMSS), facilitating exercise monitoring and testing (Coates et al., 2023; Jamnick et al., 2020). Methods to identify the LT and MMSS often require multiple invasive laboratory visits, translate poorly to real world settings, and/or incorrectly assume that these physiological attributes are static (Jamnick et al., 2020; Maunder et al., 2021); therefore, simple and translatable methods that consider how these attributes may shift in response to prolonged exercise, previous exercise, or other relevant external and internal stimuli are needed. Such methods may include heart rate variability (HRV) analysis to identify exercise thresholds and monitor physiological shifts from exercise (Gronwald & Hoos, 2020; Kaufmann et al., 2023; Rogers, Giles, Draper, Hoos, et al., 2021; Rogers & Gronwald, 2022)

The short-term scaling exponent  $\alpha_1$ , derived from detrended fluctuation analysis (DFA $\alpha_1$ ), is an index that represents fractal, self-similar patterns within a physiological signal like HRV (Goldberger et al., 2002; Peng et al., 1995). To derive DFA $\alpha_1$ , the root mean square (RMS) fluctuation of the integrated and detrended HRV RR-interval time-series data is evaluated in observation windows of different sizes (Peng et al., 1995). DFA $\alpha_1$  is then calculated as the slope between the RMS fluctuation data in relation to the different window sizes on a log-log scale (Peng et al., 1995).

During incremental exercise, HRV DFA $\alpha_1$  exhibits an intensity-dependent loss of correlation properties with increasing exercise intensity (Gronwald & Hoos, 2020; Gronwald, Rogers, et al., 2020). At moderate intensities, DFA $\alpha_1$  has values near 1.0, representing correlated

patterns. As exercise transitions to the heavy intensity domain, values near 0.75 emerge, indicating a half-way loss of correlation properties. As exercise transitions to the severe intensity domain, values reach 0.5 and lower, indicating uncorrelated or anti-correlated patterns, respectively. This intensity-dependent response has led to suggestions that DFA $\alpha$ 1 values of 0.75 and 0.5 represent the first and second exercise thresholds, respectively (Gronwald & Hoos, 2020; Gronwald, Rogers, et al., 2020; Mateo-March et al., 2023; Rogers, Giles, Draper, Hoos, et al., 2021; Rogers, Giles, Draper, et al., 2021a; Schaffarczyk et al., 2023). DFA $\alpha$ 1 also responds to exercise training stress. For example, an attenuation of DFA $\alpha$ 1 was observed after prolonged ultramarathon running (Rogers, Mourot, et al., 2021) and during a marathon, despite a reduction in running speed (Gronwald et al., 2021). Yet, DFA $\alpha$ 1 has not been measured during constant-intensity exercise relative to physiological thresholds, and it is unknown whether DFA $\alpha$ 1-derived thresholds determined from incremental exercise translate to constant-intensity exercise.

While DFA $\alpha$ 1 is reportedly able to delineate exercise intensity domains, quantify systemic perturbation imposed by a previous bout of exhaustive exercise, and indicate fatigue accumulation during endurance exercise (Gronwald & Hoos, 2020; Rogers & Gronwald, 2022; Rogers, Mourot, et al., 2021; Schaffarczyk et al., 2022), there is limited data to support these suppositions, particularly in running. Accordingly, the purposes of this study were to: i) test whether DFA $\alpha$ 1 values of 0.75 and 0.50 coincide with the gas exchange threshold (GET) and respiratory compensation point (RCP), respectively; ii) quantify the DFA $\alpha$ 1 response during constant-speed exercise near the maximal lactate steady state (MLSS)—a proxy of the MMSS; and iii) determine the repeatability of DFA $\alpha$ 1 at MLSS. We hypothesized that DFA $\alpha$ 1 at GET and RCP would not differ from 0.75 and 0.5, respectively; DFA $\alpha$ 1 would be stable and  $\approx$  0.5 at the running speed associated with MLSS; and DFA $\alpha$ 1 at MLSS would be repeatable.

## **Methods**

### ***Participants***

Nineteen (11 male; 8 female) runners (mean [SD]; age = 29.5 [5.2] years; body mass = 68.6 [8.4] kg; height = 172.9 [8.3] cm;  $\dot{V}O_{2max}$ , 55.4 [5.6] ml·kg<sup>-1</sup>·min<sup>-1</sup>) classified as recreationally active or trained/developmental (McKay et al., 2022), were recruited using convenience sampling. Written informed consent was provided by the runners prior to participating in the experimental procedures, which were approved by the University of Calgary Conjoint Health Research Ethics Board (REB20-0111 & REB20-1377) and performed in accordance with the Declaration of Helsinki. Prior to test administration, runners completed the Physical Activity Readiness Questionnaire (PAR-Q+) to identify contraindications to exercise testing and ensure participants were free of medical conditions and injuries that could interfere with metabolic and cardiorespiratory exercise responses. All runners provided their own running shoes and wore the same shoes for all testing sessions.

### ***Experimental Design***

All runners visited the laboratory for an initial maximal incremental exercise test (van Rassel et al., 2022). Twelve of these runners (see Table 1 for description) also performed a series of 4 to 5 constant-speed running bouts to determine the running speed 5% below MLSS, at MLSS, and 5% above MLSS, and to perform a repeat trial at the determined speed associated with MLSS (van Rassel et al., 2023). Data were combined from two projects for the incremental exercise analysis; however, seven runners participated in a separate project that did not include constant-speed treadmill running tests and were therefore only included in the incremental analysis. Runners refrained from eating or consuming caffeine within 2 hours prior to their testing sessions and avoided strenuous exercise on the same day prior to the testing sessions. At

least 48 hours of time elapsed between exercise sessions. Data from this study were previously published in manuscript that validated a “Step-Ramp-Step” approach to identify the running speed and power associated with the maximal lactate steady state (van Rassel et al., 2022) and a manuscript that investigated the utility of running power as a running performance metric (van Rassel et al., 2023); however, the data presented herein (i.e., DFA $\alpha$ 1 data) are distinct and have not been reported elsewhere.

### ***Exercise Protocols***

#### *Maximal Incremental Exercise Test*

Of relevance to the present study, the maximal exercise test involved a moderate intensity step-transition (MOD; 6 min at 1.9 m·s<sup>-1</sup>, 6 min at 2.4 m·s<sup>-1</sup>, and 6 min at 1.9 m·s<sup>-1</sup>) followed by incremental treadmill running (an initial speed of 1.9 m·s<sup>-1</sup> and increasing by ~0.2 m·s<sup>-1</sup> [i.e., 0.5 mph] per min) until volitional exhaustion (van Rassel et al., 2022). Incremental tests were considered maximal if a plateau in  $\dot{V}O_2$  was observed (i.e., < 150 mL·min<sup>-1</sup>) despite an increase in running intensity, or if subjects HR was  $\pm$  10 bpm of their age-predicted max, RER was greater than 1.15, or [BLa] was at least 8 mmol·L<sup>-1</sup> upon test completion.

#### *Constant Speed Treadmill Running*

The MLSS was identified as the highest treadmill speed where the difference between the [BLa] at 10 and 30 min was  $\leq$  1 mmol·L<sup>-1</sup> and at least 30 min of exercise was performed (Beneke & von Duvillard, 1996). The constant-speed sessions consisted of 5 min of treadmill running at 1.9 m·s<sup>-1</sup>, followed by treadmill running at the pre-determined testing speed (van Rassel et al., 2022). Constant-speed sessions were performed until running tests were completed at speeds 5% above, 5% below, and at MLSS. A repeated trial at the MLSS was conducted during participants’ final visits. Participants were encouraged to run until volitional exhaustion

up until a maximum duration of 45 min (excluding warm-up); however, data collected past 30 minutes were not included in the present study.

## ***Equipment and Measurements***

### *Cardiorespiratory Measurements*

All running tests were conducted on a treadmill (Desmo Pro Evo, Woodway USA Inc., Waukesha, WI, USA), with the treadmill incline set to 1% grade (Jones & Doust, 1996). Adjustments to treadmill speed could be made in 0.1 mph increments (i.e.,  $\sim 0.04 \text{ m}\cdot\text{s}^{-1}$ ). During all testing sessions, RR-interval data were collected using a Polar H10 chest strap (Polar Electro Oy, Kempele, Finland) with a sampling rate of 1000Hz, and recorded via Bluetooth using a Polar Vantage V (Polar Electro Oy, Kempele, Finland) watch. Ventilatory and gas exchange variables were collected using a mixing chamber (COSMED, Rome, Italy), facemask (7450 Series V2, Hans-Rudolph, Shawnee, KS, USA) connected to a 2-way non-rebreathing valve (Hans-Rudolph) and gas collection hose, and analyzed using a metabolic cart (Quark CPET, COSMED). The metabolic cart system was calibrated prior to each visit and 10-s averages of gas exchange data were used for analysis.

### *Blood Lactate Measurements*

All [BLa] data were collected using capillary blood drawn from the fingertip and analyzed for [BLa] using the Biosen C-Line (EKF Diagnostics, Cardiff, Wales; n=6) or Lactate Plus (Nova Biomedical, Waltham, MA, USA; n=13) lactate analyzer. Runners straddled the treadmill ( $\sim 60\text{-}75\text{s}$ ) during [BLa] measurements at 10 and 30 min (or task failure if  $< 30$  min).

### ***Data Processing***

The interbeat RR-interval data output was imported into Kubios HRV Premium Software version 3.5.0 (Kubios Oy, Kuopio, Finland) for preprocessing with RR-interval detrending set to

“smoothness priors” ( $\Lambda = 500$ ), automatic noise detection set to “medium”, and beat correction threshold set to “automatic.” RR-interval data files with noise or beat corrections that exceeded 3% were excluded from subsequent analysis (Rogers, Giles, Draper, et al., 2021b). Monofractal DFA $\alpha$ 1 was calculated using a linear fit of the double log RMS fluctuation data in relation to the different window sizes, with window width set to  $4 \leq n \leq 16$  (Peng et al., 1995). A modified Python script (Pickus, 2017) calculated DFA $\alpha$ 1 from the processed RR-interval data files using 2 min of RR-interval data (Chen et al., 2002; Hautala et al., 2003) and re-calculated DFA $\alpha$ 1 every 10 s. For example, the DFA $\alpha$ 1 value corresponding to minute 8 in Figure 1 was calculated using RR-interval data collected from minutes 7 to 9 of the treadmill running protocols. This procedure was performed for all running trials.

$\dot{V}O_{2\max}$  was identified as the highest 30s average  $\dot{V}O_2$  achieved during the incremental test. The GET was identified as the  $\dot{V}O_2$  associated with a disproportionate increase in the rate of carbon dioxide production ( $\dot{V}CO_2$ ) and minute ventilation ( $\dot{V}_E$ ) relative to the increase in  $\dot{V}O_2$  (Beaver et al., 1986). The RCP was identified as the  $\dot{V}O_2$  associated with a second disproportionate increase in  $\dot{V}_E$  as well as a disproportionate increase in  $\dot{V}_E/\dot{V}CO_2$  relative to the increase in  $\dot{V}O_2$  (Beaver et al., 1986). GET and RCP were determined by the primary researcher and two independent researchers prior to reaching a consensus.

#### *HRV Threshold Determination*

The following procedure was performed to identify the  $\dot{V}O_2$  associated with DFA $\alpha$ 1 values of 0.75 (i.e.,  $HRV_{GET}$ ) and 0.50 (i.e.,  $HRV_{RCP}$ ). First, the DFA $\alpha$ 1 time-series data were time-aligned with  $\dot{V}O_2$  measurements during the incremental treadmill running test. Subsequently, linear regression was performed on a subset of the  $\dot{V}O_2$ -DFA $\alpha$ 1 data starting from values near 1.0 to approximately 0.5, or below if values continued linearly, based upon



previously established methodology (Rogers, Giles, Draper, Hoos, et al., 2021; Rogers, Giles, Draper, et al., 2021a). Using this linear equation, the  $\dot{V}O_2$  values associated with a DFA $\alpha$ 1 of 0.75 and 0.5 were identified as the HRV<sub>GET</sub> and HRV<sub>RCP</sub>, respectively.

### *Constant Speed Treadmill Running*

DFA $\alpha$ 1 time-series data were averaged between min 7-8, 17-18, and 27-28 (or 1-min prior to the final minute before task failure) and used to represent the 10-min, 20-min, and 30-min time points during constant-speed running trials, respectively, to avoid any effect of the temporary stoppage in running to collect [BLa] on subsequent DFA $\alpha$ 1 analysis. For example, the DFA $\alpha$ 1 values corresponding to the 10<sup>th</sup> minute represents the average DFA $\alpha$ 1 measurement calculated between minute 7 and 8, which consists of RR-interval data collected from minutes 6 to 9 during the constant-speed treadmill running protocols (Figure 1). In addition, the ‘expected’ DFA $\alpha$ 1 values during the constant-speed treadmill tests were calculated and used to represent the expected DFA $\alpha$ 1 response during constant-speed treadmill running tests at the MLSS. This value was calculated as the DFA $\alpha$ 1 value corresponding to the RCP using the linear  $\dot{V}O_2$ -DFA $\alpha$ 1 regression from the incremental exercise test, and only calculated for participants who completed both incremental and constants-speed testing.

### *Statistics*

Paired Student’s *t* tests were used to compare pairs of variables. Effect sizes were calculated using Cohen’s *d* for paired variables (Cohen, 1992). Level of correlation was assessed using Pearson’s correlation coefficients. Agreement was assessed by Bland-Altman analyses (95% limits of agreement) and two-way mixed effects, absolute agreement, single rater intraclass correlation models, wherein reliability was interpreted as poor ( $ICC < 0.5$ ), moderate ( $0.5 \leq ICC < 0.75$ ), good ( $0.75 \leq ICC < 0.9$ ), or excellent ( $ICC \geq 0.9$ ) (Koo & Li, 2016). Two-way repeated

measures ANOVAs were used to assess the effects of intensity and duration on DFA $\alpha$ 1 during constant-speed running trials near MLSS, and to test the effects of trial and duration between repeat trials at MLSS. Data are presented as mean [standard deviation (SD)]. Statistical significance was set at an  $\alpha$  level of  $< 0.05$ . Statistical analyses were performed using Statistical Package for the Social Sciences (SPSS, version 26, IBM, Armonk, NY, USA), with data visualization performed using Prism (version 10.1.0 for macOS, GraphPad Software, San Diego, California USA).

## **Results**

### ***Data Inclusion***

Data sets from participants exercise tests with RR-interval artifact percentages  $> 3\%$ , in the RR-interval section of interest (Rogers, Giles, Draper, et al., 2021b), were removed from subsequent analysis, including two of 19 ramp-incremental tests ( $n=17$ ); one of 12 constant-speed running tests ( $n=11$ ); and two of 12 repeat trial tests ( $n=10$ ).

### ***Participants***

Table 1 displays participant characteristics, incremental exercise testing results, and HRV-derived thresholds. All incremental tests were maximal, and the duration of the incremental test portion of the SRS protocol was 12.5 [1.8] min. All twelve runners completed at least 30 min of treadmill running 5% below MLSS, at MLSS, and during the repeat trial at MLSS; however, four runners included in the final analysis were unable to complete 30 min of running 5% above MLSS.

### ***HRV Threshold Determination***

Figure 2 displays the individual  $\dot{V}O_2$ -DFA $\alpha$ 1 responses during incremental treadmill running and the linear regression equations used to derive HRV<sub>GET</sub> and HRV<sub>RCP</sub>. The HRV<sub>GET</sub>

(42.3 [4.6] mL·kg<sup>-1</sup>·min<sup>-1</sup>) was strongly associated and had moderate agreement with the GET (38.7 [3.4] mL·kg<sup>-1</sup>·min<sup>-1</sup>;  $r=0.80$ ,  $p<0.001$ ; ICC=0.710, 95% C.I.=−0.193-0.916; Figure 3), but overestimated the GET by 3.6 mL·kg<sup>-1</sup>·min<sup>-1</sup> (LOA: −9.1 to 1.9 mL·kg<sup>-1</sup>·min<sup>-1</sup>;  $p<0.001$ ;  $d=1.28$ ; Figure 3). The HRV<sub>RCP</sub> (52.0 [8.0] mL·kg<sup>-1</sup>·min<sup>-1</sup>) was strongly associated and had moderate agreement with the RCP (48.6 [4.4] mL·kg<sup>-1</sup>·min<sup>-1</sup>;  $r=0.77$ ,  $p<0.001$ ; ICC=0.730, 95% C.I.=0.227-0.904; Figure 3), but overestimated the RCP by 3.5 mL·kg<sup>-1</sup>·min<sup>-1</sup> (LOA: −14.1 to 7.2 mL·kg<sup>-1</sup>·min<sup>-1</sup>;  $p=0.019$ ;  $d=0.63$ ; Figure 3).

### ***Constant-Speed Running Near the MLSS***

Figure 4 displays the DFA $\alpha$ 1 responses at 10-, 20-, and 30-min (or task failure if < 30 min) during constant-speed running trials performed near MLSS. Mean [SD] DFA $\alpha$ 1 measurements at 10-, 20-, and 30-min were 0.78 [0.26], 0.73 [0.23], and 0.62 [0.11] 5% below MLSS; 0.72 [0.12], 0.64 [0.13], and 0.50 [0.15] at the MLSS; and 0.66 [0.13], 0.48 [0.13] and 0.43 [0.09] 5% above MLSS. No significant intensity x duration interaction effect was detected for DFA $\alpha$ 1 ( $p=0.207$ ); however, there were main effects of intensity ( $p=0.019$ ) and duration ( $p=0.001$ ), with differences in DFA $\alpha$ 1 measurements 5% below compared to 5% above MLSS ( $p=0.048$ ) and at MLSS compared to 5% above MLSS ( $p=0.004$ ), but not 5% below MLSS compared to at MLSS and differences between all time points ( $p < 0.05$  for all post hoc comparisons; Figure 4).

The 10-, 20-, and 30-min DFA $\alpha$ 1 measurements during repeat trials at MLSS are presented in Figure 4. A significant trial x duration interaction effect was detected for DFA $\alpha$ 1 between MLSS trials ( $p=0.022$ ) as well as a main effect of duration ( $p=0.014$ ). No main effect of trial was detected ( $p=0.926$ ). Pairwise comparisons did not reveal a significant difference in DFA $\alpha$ 1 between trial or duration pairings ( $p>0.05$  for all post hoc comparisons; Figure 4).

## Discussion

In support of recent investigations (Mateo-March et al., 2023; Rogers, Giles, Draper, Hoos, et al., 2021; Rogers, Giles, Draper, et al., 2021a; Schaffarczyk et al., 2023), the present study detected strong correlations and moderate agreement between the  $HRV_{GET}$  and GET and between the  $HRV_{RCP}$  and RCP; however, the HRV method overestimated both the GET and RCP and produced relatively wide LOA between  $HRV_{RCP}$  and RCP measures. Further, in contrast to our hypothesis, 30-min of constant-speed treadmill running at the MLSS (i.e., the upper boundary of heavy intensity domain) yielded a wide range of  $DFA\alpha1$  values (i.e., 0.31 to 0.95), indicative of exercise intensities spanning the three intensity domains if the threshold values of 0.75 and 0.5 were considered (Mateo-March et al., 2023; Rogers, Giles, Draper, et al., 2021a). Overall, our results suggest that the HRV method may provide inaccurate estimations of exercise thresholds and that the intensity-dependent  $DFA\alpha1$  response during incremental running is not equivalent to the intensity-dependent  $DFA\alpha1$  response during constant-speed running. Despite this dissociation, the  $DFA\alpha1$  response during constant speed running was intensity- and duration-dependent and repeatable, suggesting it may provide a metric that can quantify systemic perturbations and characterize physiological shifts imposed by intense, continuous exercise.

In contrast to our hypothesis, fixed  $DFA\alpha1$  values did not accurately identify exercise thresholds. On average, the  $HRV_{GET}$  overestimated the GET, but in alignment with previous investigations (Mateo-March et al., 2023; Rogers, Giles, Draper, Hoos, et al., 2021; Schaffarczyk et al., 2023), the two measurements were strongly correlated and had comparable LOA. Similarly, the  $HRV_{RCP}$  overestimated the RCP, and the two measures were strongly associated; but in contrast to the  $HRV_{GET}$ , the LOA between the  $HRV_{RCP}$  and RCP were wide. Wide LOA between evaluations of the RCP and  $HRV_{RCP}$  have previously been found (Mateo-March et al.,

2023; Rogers, Giles, Draper, et al., 2021a). Of note, it appears that the agreement between the  $HRV_{RCP}$  and RCP measurements was influenced by runner fitness level, as RCP measurements, which are directly associated with running performance capacity (Bassett & Howley, 2000), were higher in runners with larger biases between the  $HRV_{RCP}$  and RCP (Table 1; Figure 3).

Accordingly, our results suggest that using fixed DFA $\alpha$ 1 values 0.75 and 0.50 to identify ventilatory threshold during incremental running may produce variable and systemic overestimations of exercising intensity, particularly when using this method to detect the RCP.

The intensity-dependent response of DFA $\alpha$ 1 during incremental exercise has been repeatedly reported (Mateo-March et al., 2023; Rogers, Giles, Draper, Hoos, et al., 2021; Rogers, Giles, Draper, et al., 2021a; Schaffarczyk et al., 2023). Generally, this association is described as an inverse relationship with DFA $\alpha$ 1 values starting between  $\sim$ 1.0-1.5 at moderate intensities, decreasing to  $\sim$ 0.75 as intensity transitions from the moderate to the heavy domain, and continuing to drop past 0.5 as intensity transitions from the heavy to the severe domain. Along with non-neural factors that adjust during exercise, these responses are attributable to parasympathetic nervous system withdrawal and sympathetic nervous system activation as exercise intensity increases (Persson, 1996; Shaffer & Ginsberg, 2017; White & Raven, 2014). In support of this well documented intensity dependent DFA $\alpha$ 1 response, we found similar—albeit, highly variable—DFA $\alpha$ 1 responses during incremental running (Figure 2). For example, the DFA $\alpha$ 1 range and  $\dot{V}O_2$ -DFA $\alpha$ 1 slopes (calculated using DFA $\alpha$ 1 values between  $\sim$ 1.0 and 0.5) were highly variable, with some runners DFA $\alpha$ 1 values never exceeding 1.0 or falling below 0.5 (Figure 2). There also appeared to be a relationship between fitness level and the capacity for DFA $\alpha$ 1 to fluctuate, as fitter runners (i.e., higher  $\dot{V}O_{2max}$ ) seemed to demonstrate a more dynamic DFA $\alpha$ 1 response including larger ranges in DFA $\alpha$ 1 (i.e., highest vs. lowest values) and

more gradual declines in DFA $\alpha$ 1 compared to less fit runners (i.e., lower  $\dot{V}O_{2\max}$ ) (Figure 2). Accordingly, our results support an intensity-dependent DFA $\alpha$ 1 response during incremental treadmill running that is related to exercising thresholds and DFA $\alpha$ 1 values of 0.75 and 0.5. However, rather than indicating exercising thresholds, it appears that the DFA $\alpha$ 1 response may provide an indication of the physiological perturbation caused by incremental exercise, which—although highly related to exercise intensity—may not necessarily provide an accurate indication of exercise thresholds. In alignment with this “physiological perturbation” hypothesis, repeated incremental running has previously been found to shift the agreement between ventilatory threshold and DFA $\alpha$ 1 derived thresholds (Van Hooren et al., 2023). In the current investigation, the HRV<sub>RCP</sub> seemed to be overestimated by a larger degree in fitter runners (i.e., higher relative RCP; Figure 3), suggesting that fitter runners may have a greater capacity to resist physiological perturbation from incremental running, while the narrow DFA $\alpha$ 1 response in less fit runners (i.e., lower  $\dot{V}O_{2\max}$ ; Figure 2) may suggest that the physiological demand of the incremental running test was relatively high.

In further support of this speculation, the findings from our constant-speed running trials near MLSS provide evidence that both exercise intensity and duration affect the DFA $\alpha$ 1 response (Figure 4). These responses were repeatable and independent of exercise intensity relative to the MLSS (Figure 4). Indeed, using the fixed DFA $\alpha$ 1 framework, DFA $\alpha$ 1 measurements after 10 minutes of constant-speed running 5% above the MLSS, were indicative of exercise within the heavy intensity domain (i.e., averaging 0.66), with some runners displaying HRV correlation values indicative of exercise in the moderate intensity domain (i.e., > 0.75; Figure 4). Although constant-speed running at MLSS did produce DFA $\alpha$ 1 responses within the expected range for heavy intensity exercise (i.e., between 0.75 and 0.5), some runners’ DFA $\alpha$ 1 values remained

above this range after 30 min of exercise at the MLSS despite DFA $\alpha$ 1 clearly responding to exercise duration (Figure 4). Accordingly, during constant-intensity exercise, it does not appear that DFA $\alpha$ 1 provides an indication of exercising intensity domain and may instead indicate the accumulation of exercise fatigue or overall physiological demand of a given task. Previous investigations have found similar effects of duration on DFA $\alpha$ 1, with an attenuation in the DFA $\alpha$ 1 signal during a 10-km race in slower runners (Gronwald, Hoos, et al., 2020); a reduction in DFA $\alpha$ 1 measures following an ultramarathon (Rogers, Mourot, et al., 2021); and a continued decrease in DFA $\alpha$ 1 measures over the course of a marathon (Gronwald et al., 2021). The results from our investigation also suggest that these responses are repeatable over a given duration and intensity (Table 2; Figure 4), and support previous suggestions (Gronwald et al., 2021; Rogers & Gronwald, 2022) that DFA $\alpha$ 1 represents an indication of the systemic demand of exercise.

### ***Experimental considerations***

Previous investigations suggest that maximal exercise immediately preceding an incremental test can affect the agreement between ventilatory and DFA $\alpha$ 1 threshold (Van Hooren et al., 2023). Accordingly, the 18-minute MOD step performed immediately before the incremental test may have affected the agreement between ventilatory and DFA $\alpha$ 1 measures in the current investigation; however, due to the overestimation of ventilatory thresholds, it is possible that moderate intensity exercise prior to incremental exercise may attenuate the DFA $\alpha$ 1 response. With consideration to the highly variable  $\dot{V}O_2$ -DFA $\alpha$ 1 slopes observed during incremental exercise, slight changes to the starting points (i.e., DFA $\alpha$ 1 values near 1.0) and finishing points (i.e., DFA $\alpha$ 1 values near 0.5) included in the linear regression equation can dramatically affect HRV threshold estimations; therefore, the effect of model fitting and model type (e.g., linear vs. polynomial) on HRV threshold determination should be investigated further.

It should also be noted that detecting GET and RCP is subject to inter-rater biases, and although a consensus between three researchers was made prior to determining the GET and RCP, inaccurate assessments may have influenced the agreement ventilatory and HRV thresholds. Finally, our results should be considered with respect to our method of intensity domain demarcation as the MLSS may indeed represent the upper boundary of heavy intensity exercise, while metrics such as critical speed or critical power may provide a better representation of the MMSS boundary itself (Nixon et al., 2021).

### ***Conclusion***

The results from this investigation provide additional evidence supporting the strong associations between the DFA $\alpha$ 1 threshold detection methodology with the GET and RCP but questions the utility of this method to accurately detect exercise thresholds in practice. Our results suggest that incremental exercise does not produce equivalent HRV correlation profiles as constant-speed treadmill running near MLSS and that DFA $\alpha$ 1 should not be used to indicate exercise intensity domain during constant speed treadmill running. DFA $\alpha$ 1 measures at MLSS were repeatable and affected by both duration and intensity. In conclusion, our study suggests that DFA $\alpha$ 1 offers a dimensionless index of the complex regulation of human activity during exercise that may indicate fatigue accumulation and physiological perturbation from prolonged exercise stress. This metric may provide utility to characterize the physiological shifts inflicted by high-intensity continuous exercise to profile a runner's performance capacity.



## **Acknowledgments**

This investigation was supported by an operating grant from the Natural Sciences and Engineering Research Council of Canada (NSERC; grant number RGPIN-2018-06424) and start-up funding from the Faculty of Kinesiology (University of Calgary) received by MJM. CVR was funded by NSERC, the NSERC CREATE Wearable Technology and Collaboration (We-TRAC) Training Program, an Alberta Innovates Graduate Student Scholarship for Data-Enabled Innovation, and an Alberta Graduate Excellence Scholarship. The authors would like to acknowledge the contributions of all participants, students, faculty, and staff, who assisted and made this investigation possible.

## **Disclosure of interest**

MR is the founder of the software application used for data processing, AI Endurance (<https://aiendurance.com>). All other authors declare no conflicts of interest.

## References

- Bassett, D. R., & Howley, E. T. (2000). Limiting factors for maximum oxygen uptake and determinants of endurance performance. *Medicine & Science in Sports & Exercise*, 32(1), 70-84. doi.org/10.1097/00005768-200001000-00012
- Beaver, W. L., Wasserman, K., & Whipp, B. J. (1986). A new method for detecting anaerobic threshold by gas exchange. *Journal of applied physiology*, 60(6), 2020-2027. doi.org/10.1152/jappl.1986.60.6.2020
- Beneke, R., & von Duvillard, S. P. (1996). Determination of maximal lactate steady state response in selected sports events. *Medicine & Science in Sports & Exercise*, 28(2), 241-246. doi.org/10.1097/00005768-199602000-00013
- Chen, Z., Ivanov, P. C., Hu, K., & Stanley, H. E. (2002). Effect of nonstationarities on detrended fluctuation analysis. *Physical review E*, 65(4), 041107. doi.org/10.1103/PhysRevE.65.041107
- Coates, A. M., Joyner, M. J., Little, J. P., Jones, A. M., & Gibala, M. J. (2023). A perspective on high-intensity interval training for performance and health. *Sports Medicine*, 1-12. doi.org/10.1007/s40279-023-01938-6
- Cohen, J. (1992). Quantitative methods in psychology: A power primer. *Psychological Bulletin*, 112, 1155-1159. doi.org/10.1037/0033-2909.112.1.155
- Esteve-Lanao, J., Foster, C., Seiler, S., & Lucia, A. (2007). Impact of training intensity distribution on performance in endurance athletes. *Journal of Strength & Conditioning Research*, 21(3), 943-949. doi.org/10.1519/00124278-200708000-00048
- Goldberger, A. L., Amaral, L. A., Hausdorff, J. M., Ivanov, P. C., Peng, C.-K., & Stanley, H. E. (2002). Fractal dynamics in physiology: alterations with disease and aging. *Proceedings*

*of the national academy of sciences*, 99(suppl\_1), 2466-2472.

[doi.org/10.1073/pnas.012579499](https://doi.org/10.1073/pnas.012579499)

Gronwald, T., & Hoos, O. (2020). Correlation properties of heart rate variability during endurance exercise: A systematic review. *Annals of Noninvasive Electrocardiology*, 25(1), e12697. [doi.org/10.1111/anec.12697](https://doi.org/10.1111/anec.12697)

Gronwald, T., Hoos, O., & Hottenrott, K. (2020). Influence of performance level of male runners on non-linear dynamics of heart rate variability during a 10Km race. *International Journal of Performance Analysis in Sport*, 20(4), 569-583.

[doi.org/10.1080/24748668.2020.1764746](https://doi.org/10.1080/24748668.2020.1764746)

Gronwald, T., Rogers, B., & Hoos, O. (2020). Fractal correlation properties of heart rate variability: a new biomarker for intensity distribution in endurance exercise and training prescription? *Frontiers in Physiology*, 11, 550572. [doi.org/10.3389/fphys.2020.550572](https://doi.org/10.3389/fphys.2020.550572)

Gronwald, T., Rogers, B., Hottenrott, L., Hoos, O., & Hottenrott, K. (2021). Correlation properties of heart rate variability during a marathon race in recreational runners: potential biomarker of complex regulation during endurance exercise. *Journal of Sports Science & Medicine*, 20(4), 557. [doi.org/10.52082/jssm.2021.557](https://doi.org/10.52082/jssm.2021.557)

Hautala, A. J., Mäkikallio, T. H., Seppänen, T., Huikuri, H. V., & Tulppo, M. P. (2003). Short-term correlation properties of R–R interval dynamics at different exercise intensity levels. *Clinical physiology and functional imaging*, 23(4), 215-223. [doi.org/10.1046/j.1475-097X.2003.00499.x](https://doi.org/10.1046/j.1475-097X.2003.00499.x)

Jamnick, N. A., Pettitt, R. W., Granata, C., Pyne, D. B., & Bishop, D. J. (2020). An examination and critique of current methods to determine exercise intensity. *Sports Medicine*, 50(10), 1729-1756. [doi.org/10.1007/s40279-020-01322-8](https://doi.org/10.1007/s40279-020-01322-8)

Jones, A. M., & Doust, J. H. (1996). A 1% treadmill grade most accurately reflects the energetic cost of outdoor running. *Journal of Sports Sciences*, *14*(4), 321-327.

[doi.org/10.1080/02640419608727717](https://doi.org/10.1080/02640419608727717)

Kaufmann, S., Gronwald, T., Herold, F., & Hoos, O. (2023). Heart rate variability-derived thresholds for exercise intensity prescription in endurance sports: A systematic review of interrelations and agreement with different ventilatory and blood lactate thresholds.

*Sports Medicine-Open*, *9*(1), 59. [doi.org/10.1186/s40798-023-00607-2](https://doi.org/10.1186/s40798-023-00607-2)

Koo, T. K., & Li, M. Y. (2016). A guideline of selecting and reporting intraclass correlation coefficients for reliability research. *Journal of chiropractic medicine*, *15*(2), 155-163.

[doi.org/10.1016/j.jcm.2016.02.012](https://doi.org/10.1016/j.jcm.2016.02.012)

Mateo-March, M., Moya-Ramón, M., Javaloyes, A., Sánchez-Muñoz, C., & Clemente-Suárez, V. J. (2023). Validity of detrended fluctuation analysis of heart rate variability to determine intensity thresholds in elite cyclists. *European Journal of Sport Science*, *23*(4), 580-587.

[doi.org/10.1080/17461391.2022.2047228](https://doi.org/10.1080/17461391.2022.2047228)

Maunder, E., Seiler, S., Mildenhall, M. J., Kilding, A. E., & Plews, D. J. (2021). The importance of ‘durability’ in the physiological profiling of endurance athletes. *Sports Medicine*, *51*,

1619-1628. [doi.org/10.1007/s40279-021-01459-0](https://doi.org/10.1007/s40279-021-01459-0)

McKay, A. K., Stellingwerff, T., Smith, E. S., Martin, D. T., Mujika, I., Goosey-Tolfrey, V. L., Sheppard, J., & Burke, L. M. (2022). Defining training and performance caliber: a participant classification framework.

*International Journal of Sports Physiology and Performance*, *17*(2), 317-331. [doi.org/10.1123/ijsp.2021-0451](https://doi.org/10.1123/ijsp.2021-0451)

Nixon, R. J., Kranen, S. H., Vanhatalo, A., & Jones, A. M. (2021). Steady-state  $\dot{V}O_2$  above MLSS: evidence that critical speed better represents maximal metabolic steady state in

well-trained runners. *European Journal of Applied Physiology*, *121*, 3133-3144.

[doi.org/10.1007/s00421-021-04780-8](https://doi.org/10.1007/s00421-021-04780-8)

Peng, C. K., Havlin, S., Stanley, H. E., & Goldberger, A. L. (1995). Quantification of scaling exponents and crossover phenomena in nonstationary heartbeat time series. *Chaos*, *5*(1), 82-87. [doi.org/10.1063/1.166141](https://doi.org/10.1063/1.166141)

Persson, P. B. (1996). Modulation of cardiovascular control mechanisms and their interaction. *Physiological reviews*, *76*(1), 193-244. [doi.org/10.1152/physrev.1996.76.1.193](https://doi.org/10.1152/physrev.1996.76.1.193)

Pickus, S. (2017). *DFA.py*. Retrieved July 1st, 2023 from <https://github.com/pickus91/HRV/blob/master/DFA.py>

Rogers, B., Giles, D., Draper, N., Hoos, O., & Gronwald, T. (2021). A new detection method defining the aerobic threshold for endurance exercise and training prescription based on fractal correlation properties of heart rate variability. *Frontiers in Physiology*, *11*, 596567. [doi.org/10.3389/fphys.2020.596567](https://doi.org/10.3389/fphys.2020.596567)

Rogers, B., Giles, D., Draper, N., Mourot, L., & Gronwald, T. (2021a). Detection of the anaerobic threshold in endurance sports: validation of a new method using correlation properties of heart rate variability. *Journal of Functional Morphology and Kinesiology*, *6*(2), 38. [doi.org/10.3390/jfmk6020038](https://doi.org/10.3390/jfmk6020038)

Rogers, B., Giles, D., Draper, N., Mourot, L., & Gronwald, T. (2021b). Influence of artefact correction and recording device type on the practical application of a non-linear heart rate variability biomarker for aerobic threshold determination. *Sensors*, *21*(3), 821. [doi.org/10.3390/s21030821](https://doi.org/10.3390/s21030821)

- Rogers, B., & Gronwald, T. (2022). Fractal correlation properties of heart rate variability as a biomarker for intensity distribution and training prescription in endurance exercise: an update. *Frontiers in Physiology*, 860. doi.org/10.3389/fphys.2022.879071
- Rogers, B., Mourot, L., Doucende, G., & Gronwald, T. (2021). Fractal correlation properties of heart rate variability as a biomarker of endurance exercise fatigue in ultramarathon runners. *Physiological Reports*, 9(14), e14956. doi.org/10.14814/phy2.14956
- Schaffarczyk, M., Rogers, B., Reer, R., & Gronwald, T. (2022). Fractal correlation properties of HRV as a noninvasive biomarker to assess the physiological status of triathletes during simulated warm-up sessions at low exercise intensity: a pilot study. *BMC Sports Science, Medicine and Rehabilitation*, 14(1), 1-13. doi.org/10.1186/s13102-022-00596-x
- Schaffarczyk, M., Rogers, B., Reer, R., & Gronwald, T. (2023). Validation of a non-linear index of heart rate variability to determine aerobic and anaerobic thresholds during incremental cycling exercise in women. *European Journal of Applied Physiology*, 123(2), 299-309. doi.org/10.1007/s00421-022-05050-x
- Seiler, K. S., & Kjerland, G. Ø. (2006). Quantifying training intensity distribution in elite endurance athletes: is there evidence for an “optimal” distribution? *Scandinavian journal of medicine & science in sports*, 16(1), 49-56. doi.org/10.1111/j.1600-0838.2004.00418.x
- Shaffer, F., & Ginsberg, J. P. (2017). An overview of heart rate variability metrics and norms. *Frontiers in public health*, 258. doi.org/10.3389/fpubh.2017.00258
- Van Hooren, B., Mennen, B., Gronwald, T., Bongers, B. C., & Rogers, B. (2023). Correlation properties of heart rate variability to assess the first ventilatory threshold and fatigue in runners. *Journal of Sports Sciences*, 1-10. doi.org/10.1080/02640414.2023.2277034

van Rassel, C. R., Ajayi, O. O., Sales, K. M., Azevedo, R. A., Murias, J. M., & MacInnis, M. J.

(2022). A " Step-Ramp-Step" protocol to identify running speed and power associated with the maximal metabolic steady state. *Medicine & Science in Sports & Exercise*.

[doi.org/10.1249/MSS.0000000000003066](https://doi.org/10.1249/MSS.0000000000003066)

van Rassel, C. R., Ajayi, O. O., Sales, K. M., Griffiths, J. K., Fletcher, J. R., Edwards, W. B., &

MacInnis, M. J. (2023). Is running power a useful metric? Quantifying training intensity and aerobic fitness using Stryd running power near the maximal lactate steady state.

*Sensors*, 23(21), 8729. [doi.org/10.3390/s23218729](https://doi.org/10.3390/s23218729)

White, D. W., & Raven, P. B. (2014). Autonomic neural control of heart rate during dynamic

exercise: revisited. *The Journal of physiology*, 592(12), 2491-2500.

[doi.org/10.1113/jphysiol.2014.271858](https://doi.org/10.1113/jphysiol.2014.271858)

**Table 1.** Incremental exercise testing results, heart rate variability-derived thresholds, and expected DFA $\alpha$ 1 for participants that completed incremental and constant-speed testing or incremental testing only.

|                                                     | Subject        | Sex | $\dot{V}O_{2\max}$<br>(mL·kg <sup>-1</sup> ·min <sup>-1</sup> ) | GET<br>(mL·kg <sup>-1</sup> ·min <sup>-1</sup> ) | HRV <sub>GET</sub><br>(mL·kg <sup>-1</sup> ·min <sup>-1</sup> ) | RCP<br>(mL·kg <sup>-1</sup> ·min <sup>-1</sup> ) | HRV <sub>RCP</sub><br>(mL·kg <sup>-1</sup> ·min <sup>-1</sup> ) | DFA $\alpha$ 1<br>(a.u.)* |
|-----------------------------------------------------|----------------|-----|-----------------------------------------------------------------|--------------------------------------------------|-----------------------------------------------------------------|--------------------------------------------------|-----------------------------------------------------------------|---------------------------|
| <i>Incremental &amp; Constant<br/>Speed Testing</i> | 1              | M   | 61.7                                                            | 41.4                                             | 43.2                                                            | 55.0                                             | 62.1                                                            | 0.59                      |
|                                                     | 2              | M   | 49.7                                                            | 36.9                                             | 36.3                                                            | 42.8                                             | 40.6                                                            | 0.38                      |
|                                                     | 3              | M   | 60.9                                                            | 37.3                                             | 40.0                                                            | 52.5                                             | 48.2                                                            | 0.37                      |
|                                                     | 4              | M   | 58.2                                                            | 42.0                                             | 45.9                                                            | 51.1                                             | 57.8                                                            | 0.64                      |
|                                                     | 5              | M   | 66.7                                                            | 43.3                                             | 51.5                                                            | 54.9                                             | 66.0                                                            | 0.69                      |
|                                                     | 6              | F   | 53.3                                                            | 36.4                                             | 42.1                                                            | 44.3                                             | 45.3                                                            | 0.58                      |
|                                                     | 7              | F   | 49.5                                                            | 35.1                                             | 37.7                                                            | 43.5                                             | 43.5                                                            | 0.50                      |
|                                                     | 8              | F   | 62.5                                                            | 45.2                                             | 52.0                                                            | 53.2                                             | 56.3                                                            | 0.68                      |
|                                                     | 9              | F   | 51.4                                                            | 36.8                                             | 40.8                                                            | 46.2                                             | 44.1                                                            | 0.34                      |
|                                                     | 10             | M   | 58.2                                                            | 39.9                                             | 43.2                                                            | 49.5                                             | 59.8                                                            | 0.66                      |
|                                                     | 11             | F   | 47.5                                                            | 34.4                                             | 39.4                                                            | 42.7                                             | 49.1                                                            | 0.66                      |
|                                                     | 12             | F   | 48.7                                                            | 33.7                                             | 38.4                                                            | 42.3                                             | 43.4                                                            | 0.55                      |
|                                                     | <b>Average</b> |     | 55.7                                                            | 38.5                                             | 42.5                                                            | 48.2                                             | 51.3                                                            | 0.55                      |
|                                                     | <b>SD</b>      |     | 6.5                                                             | 3.7                                              | 5.1                                                             | 5.0                                              | 8.6                                                             | 0.13                      |
| <i>Incremental<br/>Testing Only</i>                 | 13             | F   | 56.4                                                            | 41.1                                             | 47.9                                                            | 52.5                                             | 59.9                                                            | -                         |
|                                                     | 14             | M   | 58                                                              | 38.4                                             | 39.3                                                            | 49.9                                             | 45.6                                                            | -                         |
|                                                     | 15             | M   | 54.5                                                            | 40.2                                             | 40.2                                                            | 50.2                                             | 53.8                                                            | -                         |
|                                                     | 16             | M   | 56.8                                                            | 41.0                                             | 40.0                                                            | 47.4                                             | 61.1                                                            | -                         |
|                                                     | 17             | F   | 55.9                                                            | 34.6                                             | 41.0                                                            | 47.2                                             | 47.6                                                            | -                         |
|                                                     | <b>Average</b> |     | 56.3                                                            | 39.1                                             | 41.7                                                            | 49.4                                             | 53.6                                                            | 0.55                      |
|                                                     | <b>SD</b>      |     | 1.3                                                             | 2.7                                              | 3.5                                                             | 2.2                                              | 7.0                                                             | 0.13                      |



\*Expected DFA $\alpha$ 1 correspond to the DFA $\alpha$ 1 at the respiratory compensation point (RCP) using the linear  $\dot{V}O_2$ -DFA $\alpha$ 1 regression established during incremental exercise for participants that completed both incremental and constant-speed exercise testing. This DFA $\alpha$ 1 value was used to represent the 'expected' DFA $\alpha$ 1 response during constant-speed treadmill running tests at the MLSS

## Figure captions

**Figure 1.** Example DFA $\alpha$ 1 signal from one participant during the four constant-speed trials near the maximal lactate steady state (MLSS). Data are shown during 5 minutes of constant-speed running at 1.9 m·s<sup>-1</sup> (i.e., warm-up) followed by constant-speed treadmill running for 30 minutes 5% below MLSS (3.4 m·s<sup>-1</sup>), at MLSS (3.6 m·s<sup>-1</sup>), and during a repeat trial at MLSS and ~20 minutes of constant speed running 5% above MLSS (3.8 m·s<sup>-1</sup>). The participant straddled the treadmill (~60-75s) during [BLa] measurements at 10 min and again at 30 min (or ~20 min during their running trial 5% above MLSS).

**Figure 2.**  $\dot{V}O_2$ -DFA $\alpha$ 1 responses for subjects 1 – 17 during incremental treadmill running. Purple circles indicate the DFA $\alpha$ 1 values used to identify the HRV<sub>GET</sub> and HRV<sub>RCP</sub>. Vertical dotted line indicates  $\dot{V}O_{2max}$ . Solid black line indicates trendline. DFA $\alpha$ 1 values calculated using RR-interval data with artifacts >3% were removed from the visual (n = 17).

**Figure 3.** Panel A and B show the relationships between the GET and the HRV<sub>GET</sub> and between the RCP and HRV<sub>RCP</sub> derived from the incremental treadmill running tests. Panels C and D show Bland Altman plots corresponding to the data in Panels A and B, respectively. Dashed lines represent bias and dotted lines represent 95% limits of agreement. n=17 for all panels.

**Figure 4.** A) Comparison between DFA $\alpha$ 1 measurements at 10-, 20-, and 30-min (or task failure if < 30 min) during constant-speed running trials performed 5% below (green), at (orange), and 5% above the maximal lactate steady state (MLSS) (red), and B) between repeat running trials at MLSS (purple). Dotted red line indicate the average DFA $\alpha$ 1 corresponding to the RCP from the incremental running test, or the “expected” DFA $\alpha$ 1 during constant-speed treadmill running. Asterisk (\*) indicates significant difference between pairs of durations. Obelisk (†) indicates

significant difference between the denoted intensity compared to 5% above the MLSS. Error bars represent one SD. n=11 and 10 for panels A and B, respectively.

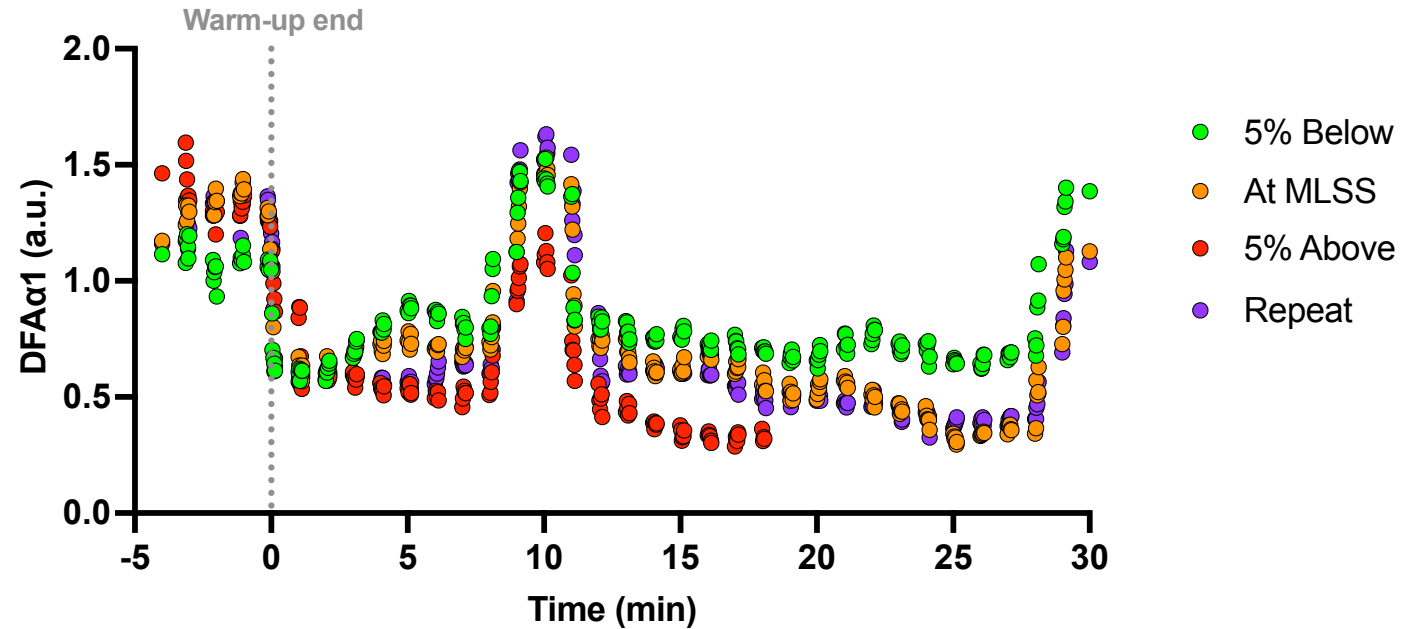

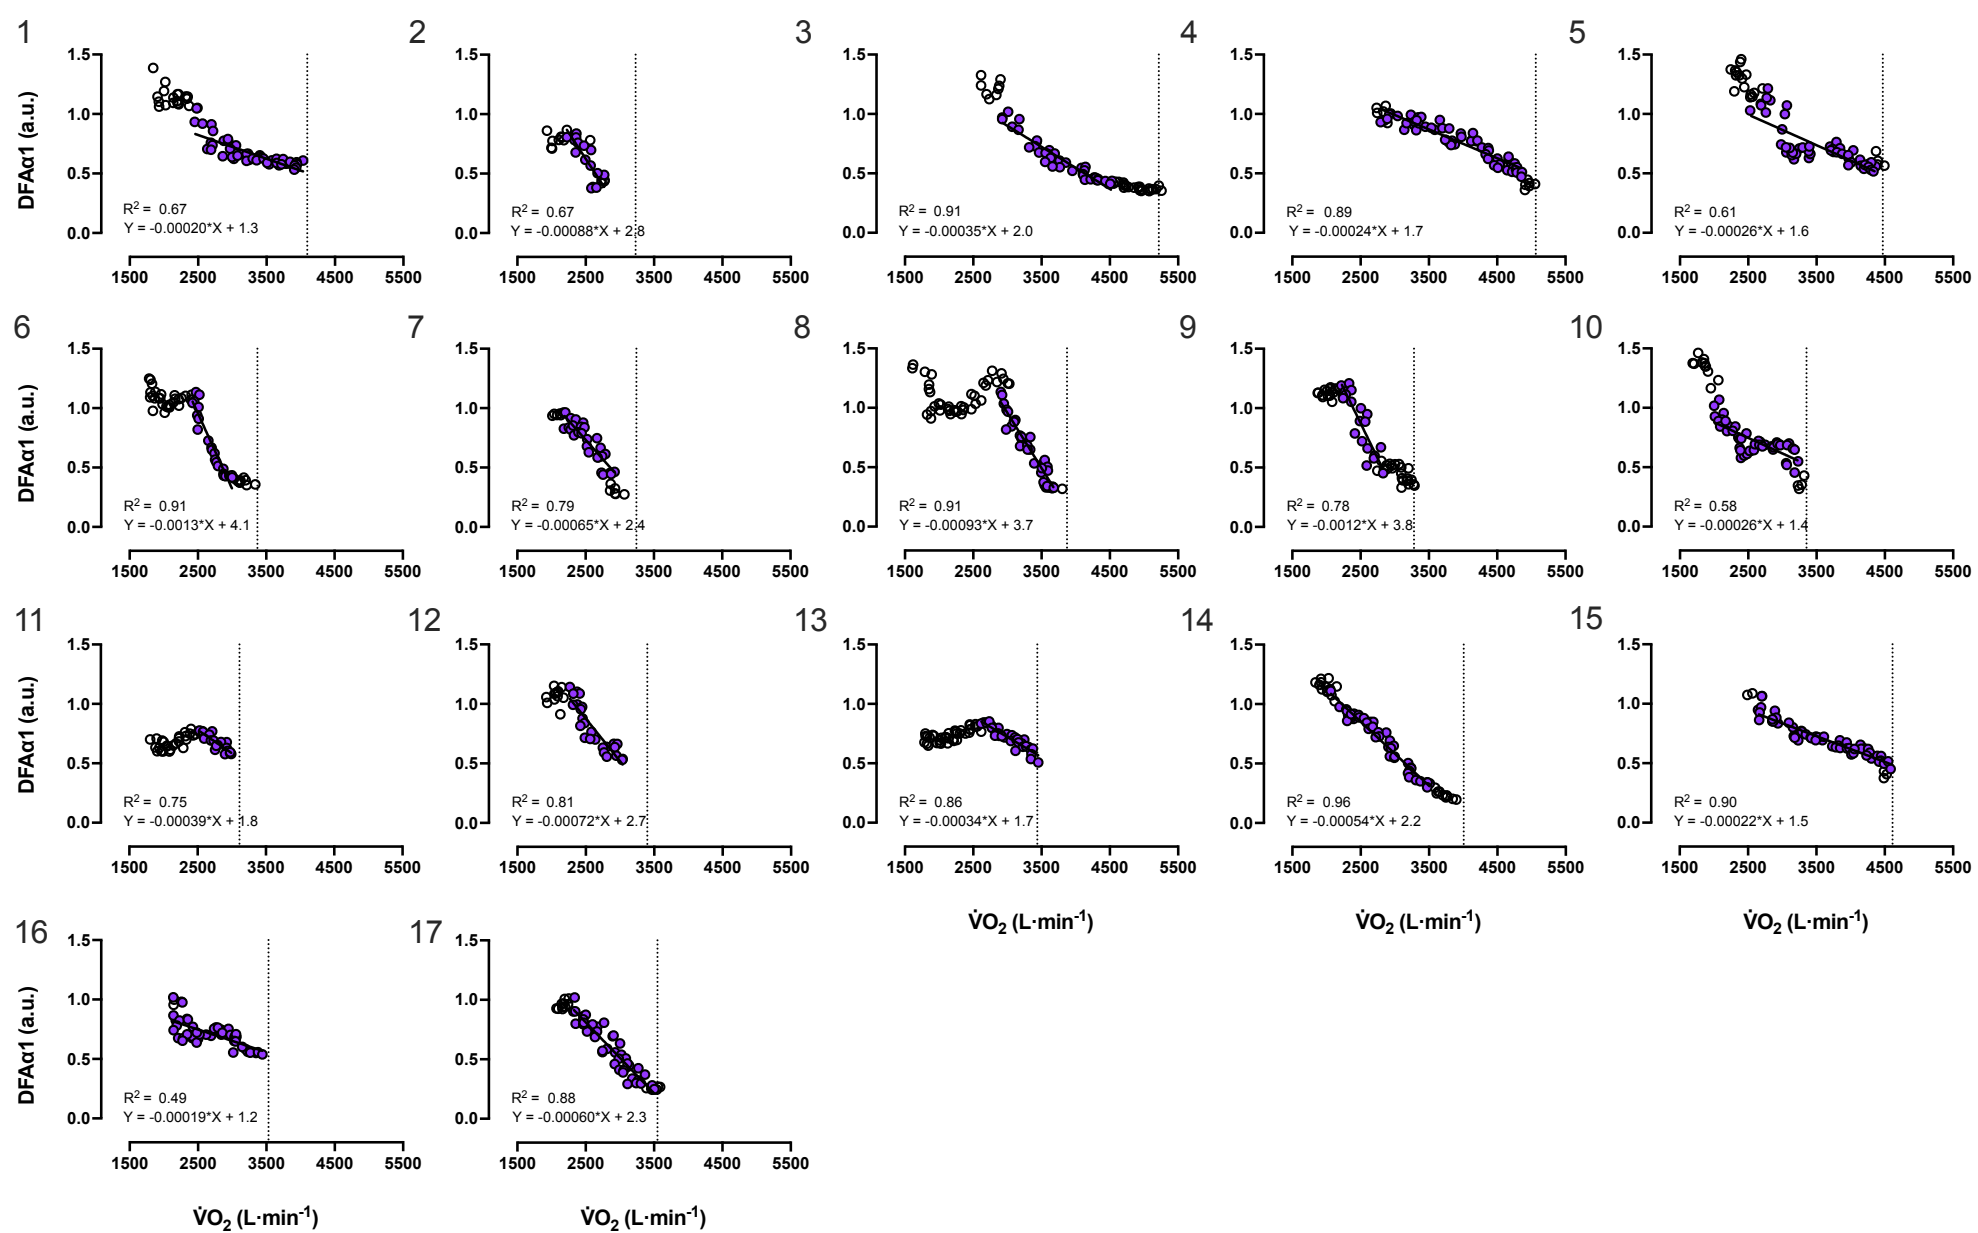

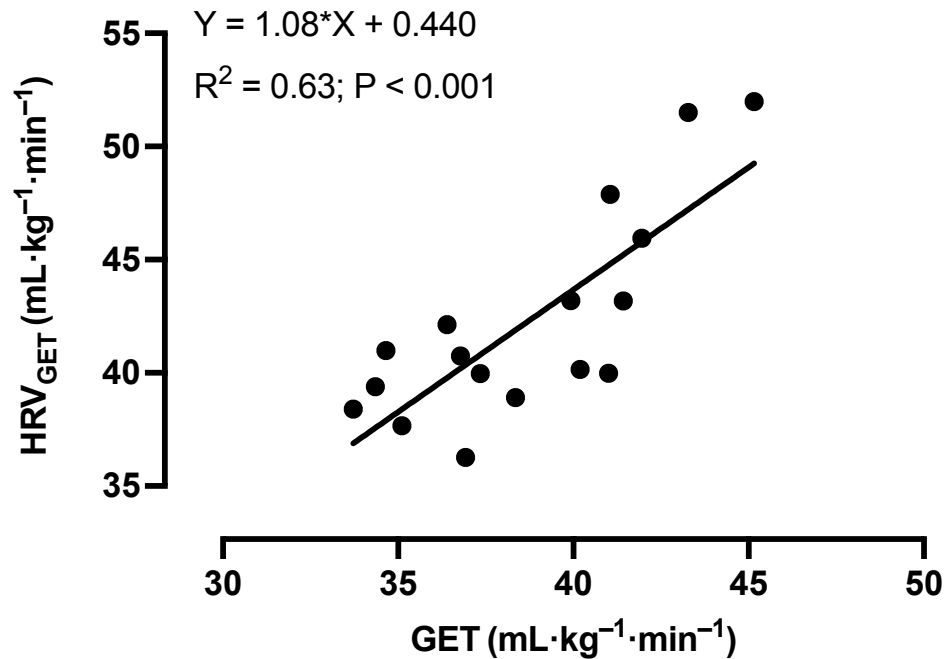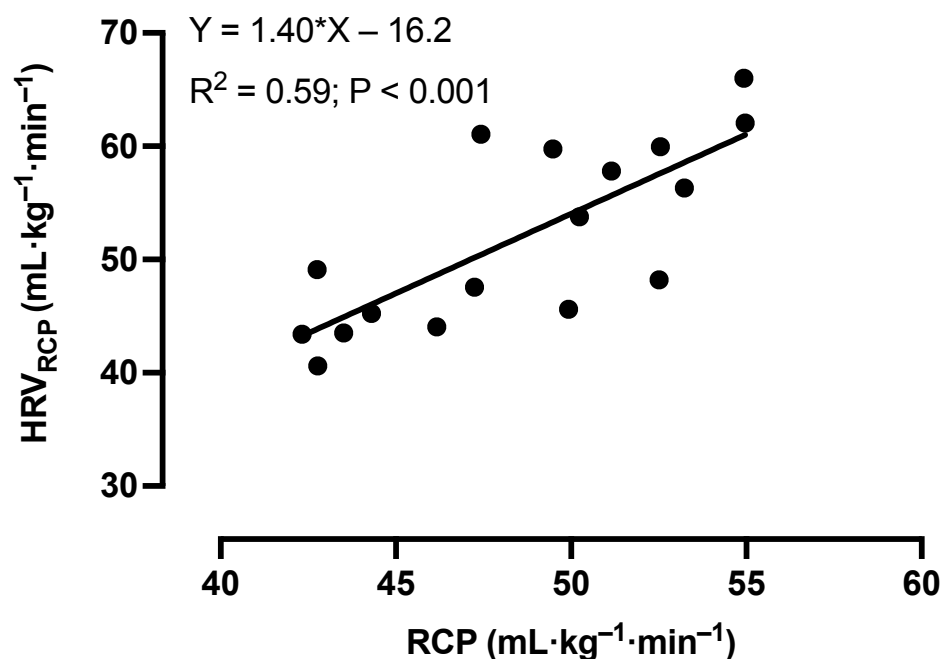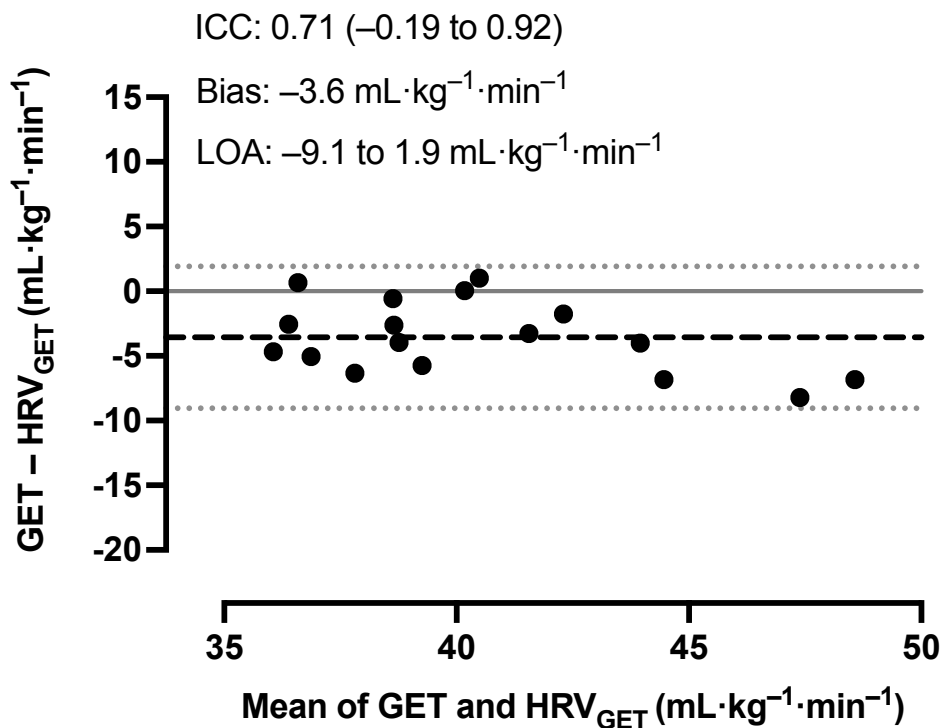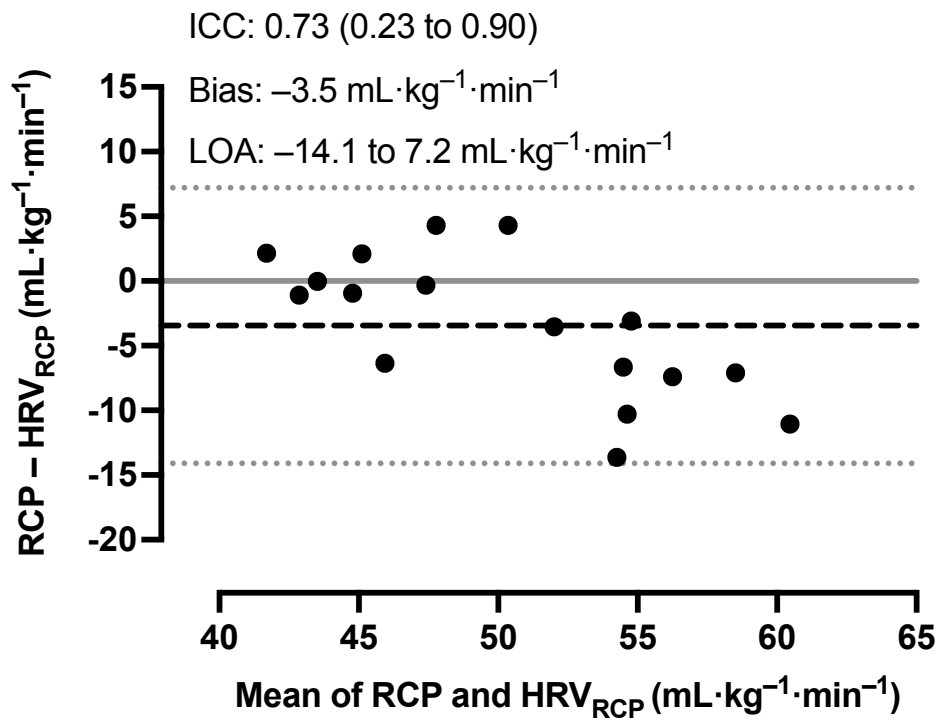

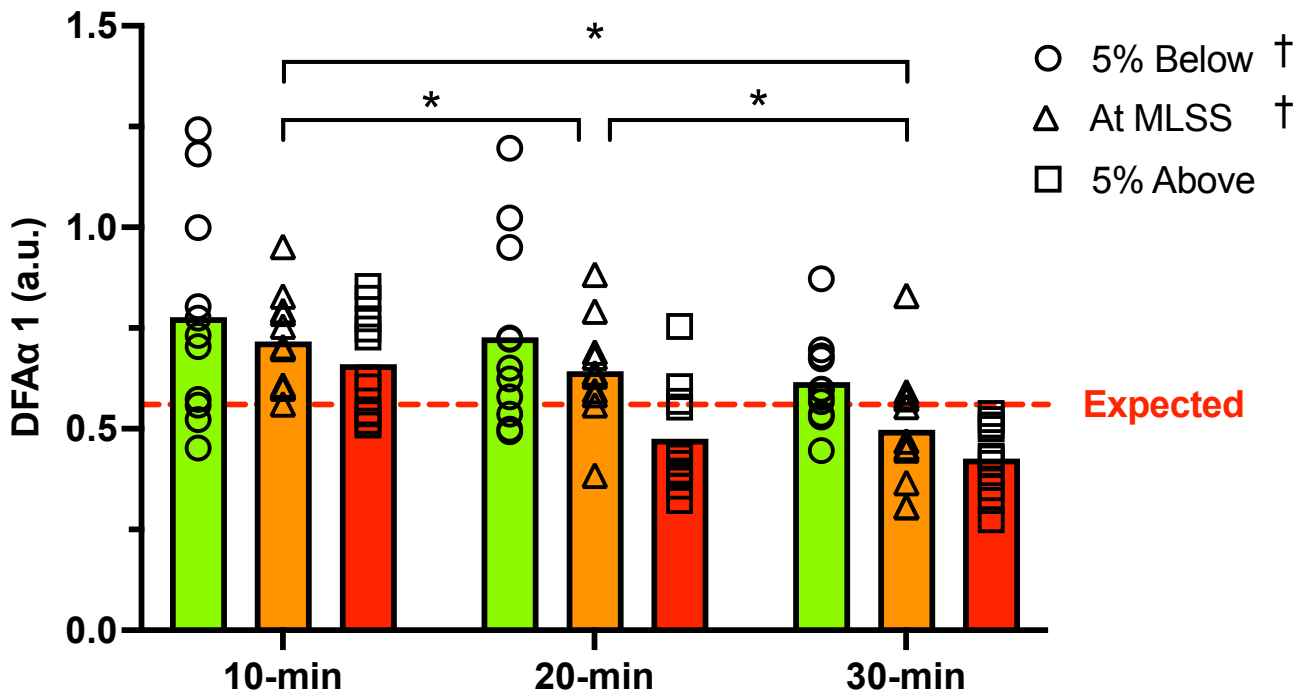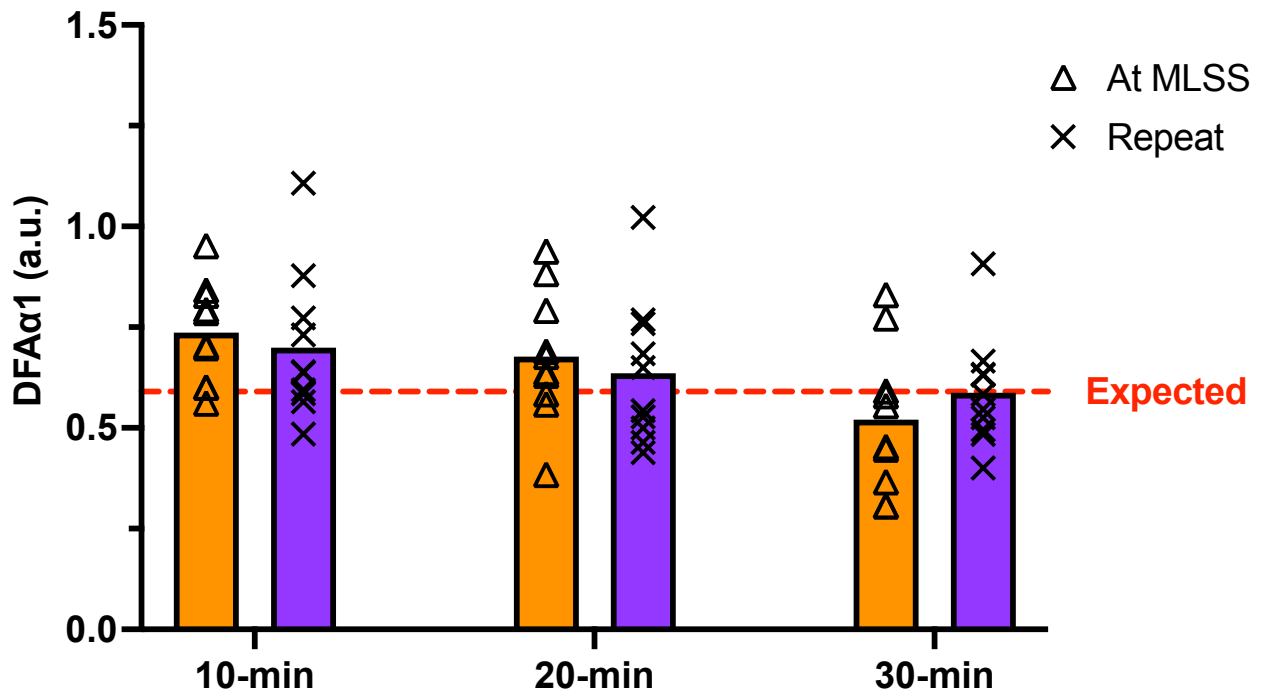

Source: https://medrxiv.org/content/10.1101/2023.12.19.23300234v1.full.pdf
